# Supplementary material for: Signatures of balancing selection in toll-like receptor (TLRs) genes – novel insights from a free-living rodent
Source: PubMed Central journal article supplement (PMC5976762; doi:10.1038/s41598-018-26672-2), 2018-05-30
Supplement: 41598_2018_26672_MOESM1_ESM.pdf [file 41598_2018_26672_MOESM1_ESM.pdf]

## SUPPLEMENTARY MATERIALS

### **Signatures of balancing selection in toll-like receptor (TLRs) genes – novel insights from a free-living rodent**

Agnieszka Kloch<sup>1</sup>, Marius A. Wenzel<sup>2</sup>, Dominik R. Laetsch<sup>3,4</sup>, Olek Michalski<sup>5</sup>, Anna Bajer<sup>6</sup>, Jerzy M Behnke<sup>7</sup>, Renata Welc-Fałęciak<sup>6</sup>, and Stuart B. Piertney<sup>2</sup>

<sup>1</sup> University of Warsaw, Department of Ecology, Faculty of Biology, Biological and Chemical Research Centre, ul. Zwirki i Wigury 101, 02-089 Warszawa, Poland

<sup>2</sup> University of Aberdeen, Institute of Biological and Environmental Sciences, Tillydrone Avenue, Aberdeen AB24 2TZ, UK

<sup>3</sup> The James Hutton Institute, Dundee DD2 5DA, United Kingdom

<sup>4</sup> University of Edinburgh, Institute of Evolutionary Biology, Edinburgh EH9 3JT, United Kingdom

<sup>5</sup> perlism.org, Data Analysis & Visualisation, ul. Przy Agorze 5a m. 98, 01-960 Warszawa, Poland

<sup>6</sup> University of Warsaw, Department of Parasitology, ul. Miecznikowa 1, 02-096, Warszawa, Poland

<sup>7</sup> School of Life Sciences, University of Nottingham, Nottinghamshire NG7, United Kingdom

## SUPPLEMENTARY TABLES

Table S1. Sequences of primers and PCR conditions used to identify infections with blood parasites. T<sub>m</sub> – melting temperature of the primers .

| parasite                         | gene        | primer     | Sequence 5' → 3'            | T <sub>m</sub> | Reference               |
|----------------------------------|-------------|------------|-----------------------------|----------------|-------------------------|
| <i>Bartonella</i><br><i>sp.</i>  | gltA        | BhCS.781p  | GGGGACCAGCTCATGGTGG         | 51             | Norman et al.<br>1995   |
|                                  |             | BhCS.1137n | AATGCAAAAAGAACAGTAAACA      |                |                         |
| <i>Babesia</i><br><i>microti</i> | 18S<br>rRNA | CRYPTO R   | GAATGATCCTTCCGCAGGTTACCTAC  | 63             | Herwaldt et al.<br>2003 |
|                                  |             | CRYPTO F   | AACCTGGTTGATCCTGCCAGTAGTCAT |                |                         |
|                                  | 18S<br>rRNA | Bab1       | CTTAGTATAAGCATAACAGC        | 55             | Persing et al..<br>1992 |
|                                  |             | Bab4       | ATAGGTCAGAACTTGAATGATACA    |                |                         |

Table S2. Differences between sites in parasite prevalence (percentage of infected hosts) following Kloch et al. (2010).

|                                 | % infected |        | differences between sites |        |
|---------------------------------|------------|--------|---------------------------|--------|
|                                 | Urwitałt   | Pilchy | $\chi^2$                  | p      |
| Nematodes                       |            |        |                           |        |
| <i>Heligmosomum mixtum</i>      | 79.1       | 0      | 51.231                    | <0.001 |
| <i>Heligmosomoides glareoli</i> | 0          | 46.3   | 23.172                    | <0.001 |
| <i>Aspicularis tetraptera</i>   | 9.3        | 41.4   | 9.926                     | 0.002  |
| Intestinal protoza              |            |        |                           |        |
| <i>Cryptosporium sp.</i>        | 34.1       | 76.9   | 11.364                    | <0.001 |
| Blood parasites                 |            |        |                           |        |
| <i>Haemobartonella sp.</i>      | 51.2       | 58.9   | 0.2378                    | 0.626  |
| <i>Hepatozoon sp.</i>           | 28.2       | 27.0   | 0.0001                    | 0.999  |
| <i>Bartonella sp.</i>           | 27.9       | 26.8   | 0.0001                    | 0.999  |
| <i>Babesia sp.</i>              | 23.25      | 17.1   | 0.1877                    | 0.665  |
| <i>Trypanosoma sp.</i>          | 18.6       | 12.8   | 0.1709                    | 0.679  |

Table S3. Sequences of primers and PCR conditions used to amplify TLR genes of the innate immune response in the bank vole. T<sub>m</sub> – melting temperature of the primers, t – extension time in seconds, cycles – number of cycles in the PCR reaction. PCR program consisted of denaturation at 98 °C for 10 sec, annealing for 30 sec at T<sub>m</sub>, and extension at 72°C (time varied), followed by final extension for 10 min at 72°C.

| locus            | primer sequence 5' → 3'    | T <sub>m</sub> | t   | cycles |
|------------------|----------------------------|----------------|-----|--------|
| TLR1             | AGCTGAGGGTCYTGATRATGT      | 62             | 120 | 35     |
|                  | CCAGCAAGATWAGGATTAAG       |                |     |        |
| TLB <sup>1</sup> | CGTGTTCTGTGGACCTTGTG       | 65             | 90  | 35     |
|                  | CTAACATCCAGCACCTCCAG       | 63             | 120 | 35     |
|                  | CTTGACATCAGCCGGAACAG       |                |     |        |
|                  | GAACCTAGGACTTTATTGCAGTTCTC |                |     |        |
| TLR4             | CCAGGTGTGAAATTGAGACA       | 59             | 120 | 35     |
|                  | CTTCTCCAGAAGATGTGCCTC      |                |     |        |
| TLR5             | CTCAGCTTCAACTACATCAG       | 60             | 120 | 35     |
|                  | CCCTCTGATrGTCTCATGTC       |                |     |        |
| TLR6             | CAAACAGGAACCTTACTCATGTC    | 64             | 100 | 35     |
|                  | CCCACGTTTGCCCTTCTCAGTAG    |                |     |        |
| TLR7             | CTTAGTTTCTASAGTCCTTG       | 59             | 120 | 35     |
|                  | CGGAGCTGAAGAACTTAGA        |                |     |        |
| TLR9             | CTTCCTACCCTGTGAGCTGAAG     | 65             | 150 | 30     |
|                  | GGTTATAGAAGTGGCGGTTGTCC    |                |     |        |

<sup>1</sup>primers by Tschirren et al. (2011)

S4. Results of GLMs testing for an effect of non-genetic terms (host body mass, host sex, and site) on parasite prevalence.  $\chi^2$  – chi-squared test statistic, p – p-value, df- degrees of freedom. *H. mixtum* and *H. glareoli* were analysed in single sites (Urwiłtał and Pilchy respectively), as each species was observed only in one site.

| parasite               | effect                | $\chi^2$      | df       | p                |
|------------------------|-----------------------|---------------|----------|------------------|
| <i>H. mixtum</i>       | host sex              | 0.003         | 1        | 0.961            |
|                        | host body mass        | 3.2800        | 1        | 0.071            |
| <i>H. glareoli</i>     | <b>host sex</b>       | <b>8.949</b>  | <b>1</b> | <b>0.003</b>     |
|                        | host body mass        | 2.393         | 1        | 0.122            |
| <i>A. tetraptera</i>   | <b>site</b>           | <b>18.511</b> | <b>1</b> | <b>&lt;0.001</b> |
|                        | host sex              | 1.655         | 1        | 0.198            |
|                        | <b>host body mass</b> | <b>4.317</b>  | <b>1</b> | <b>0.038</b>     |
| <i>Cryptosporidium</i> | <b>site</b>           | <b>11.674</b> | <b>1</b> | <b>&lt;0.001</b> |
|                        | host sex              | 1.107         | 1        | 0.292            |
|                        | <b>host body mass</b> | <b>4.082</b>  | <b>1</b> | <b>0.043</b>     |
| <i>Haemobartonella</i> | site                  | 0.580         | 1        | 0.446            |
|                        | host sex              | 1.799         | 1        | 0.180            |
|                        | host body mass        | 1.498         | 1        | 0.221            |
| <i>Bartonella sp.</i>  | site                  | 0.128         | 1        | 0.720            |
|                        | host sex              | 0.023         | 1        | 0.883            |
|                        | host body mass        | 0.499         | 1        | 0.480            |
| <i>Babesia sp.</i>     | site                  | 0.320         | 1        | 0.571            |
|                        | host sex              | 2.927         | 1        | 0.087            |
|                        | host body mass        | 0.336         | 1        | 0.562            |
| <i>Hepatozoon sp.</i>  | site                  | 0.004         | 1        | 0.944            |
|                        | host sex              | 0.0805        | 1        | 0.776            |
|                        | host body mass        | 2.734         | 1        | 0.098            |

Table S5. Results of Fu and Li D\* neutrality test with a mouse sequence as an outgroup.

|      | Fu & Li D*                       |
|------|----------------------------------|
| TLR1 | 0.270 <sup>ns</sup>              |
| TLR2 | <b>2.171</b> <sup>&lt;0.02</sup> |
| TLR4 | -0.143 <sup>ns</sup>             |
| TLR5 | <b>1.845</b> <sup>&lt;0.02</sup> |
| TLR6 | 1.059 <sup>ns</sup>              |
| TLR7 | -0.143 <sup>ns</sup>             |
| TLR9 | 0.478 <sup>ns</sup>              |

Table S6. Effect of TLR amino-acid haplotypes on a risk of infection. Each model contained as explanatory variables: genetic terms (presence/absence of amino-acid haplotypes), first and second principal component (PC1 and PC2) summarizing relatedness computed using microsatellite variation, and optional non-genetic terms as explained in *Methods*. Tables are organized by dependent variables: a) bacterial parasites, b) protists, c) nematodes. B – effect coefficient.  $\chi^2$ - chi-square statistic. p – p value as estimated in a model. FDR - p-value adjusted for multiple comparisons using false discovery rate method. Values significant after correction are marked in bold.

| a)         | <i>Haemobartonella sp.</i> |       |          |       |       | <i>Bartonella sp.</i> |         |        |          |       |              |
|------------|----------------------------|-------|----------|-------|-------|-----------------------|---------|--------|----------|-------|--------------|
| predictors | B                          | R2    | $\chi^2$ | p     | FDR   | predictors            | B       | R2     | $\chi^2$ | p     | FDR          |
| TLR 1      |                            |       |          |       |       |                       |         |        |          |       |              |
| PC1        | -0.199                     | 0.002 | 0.244    | 0.622 | 0.622 | PC1                   | -1.249  | 0.087  | 6.532    | 0.011 | 0.011        |
| PC2        | -0.057                     | 0.000 | 0.017    | 0.897 | 0.897 | PC2                   | 0.238   | -0.001 | 0.203    | 0.652 | 0.652        |
| TLR1*aa01  | -0.062                     | 0.000 | 0.011    | 0.916 | 0.963 | TLR1*aa01             | -1.328  | 0.046  | 3.952    | 0.047 | 0.140        |
| TLR1*aa02  | 0.217                      | 0.002 | 0.186    | 0.666 | 0.963 | TLR1*aa02             | -0.967  | 0.027  | 2.495    | 0.114 | 0.240        |
| TLR1*aa04  | -0.394                     | 0.003 | 0.284    | 0.594 | 0.963 | TLR1*aa04             | -1.855  | 0.076  | 4.815    | 0.028 | 0.118        |
| TLR1*aa06  | -1.667                     | 0.079 | 6.881    | 0.009 | 0.183 | TLR1*aa06             | 1.605   | 0.074  | 5.390    | 0.020 | 0.118        |
| TLR1*aa10  | -0.506                     | 0.007 | 0.560    | 0.454 | 0.963 | TLR1*aa10             | -2.951  | 0.144  | 10.617   | 0.001 | <b>0.024</b> |
| TLR 2      |                            |       |          |       |       |                       |         |        |          |       |              |
| PC1        | -0.203                     | 0.005 | 0.474    | 0.491 | 0.491 | PC1                   | -0.384  | 0.019  | 1.300    | 0.254 | 0.254        |
| PC2        | 0.010                      | 0.000 | 0.001    | 0.980 | 0.980 | PC2                   | -0.085  | 0.000  | 0.035    | 0.851 | 0.851        |
| TLR2*aa01  | -0.052                     | 0.000 | 0.009    | 0.924 | 0.963 | TLR2*aa01             | -0.451  | 0.006  | 0.568    | 0.451 | 0.592        |
| TLR2*aa06  | 0.052                      | 0.000 | 0.007    | 0.935 | 0.963 | TLR2*aa06             | -0.039  | 0.000  | 0.003    | 0.959 | 0.959        |
| TLR2*aa12  | 0.640                      | 0.008 | 0.767    | 0.381 | 0.963 | TLR2*aa12             | 0.890   | 0.021  | 1.521    | 0.217 | 0.380        |
| TLR 4      |                            |       |          |       |       |                       |         |        |          |       |              |
| PC1        | -0.353                     | 0.024 | 1.652    | 0.199 | 0.199 | PC1                   | -0.457  | 0.027  | 2.002    | 0.157 | 0.157        |
| PC2        | -0.085                     | 0.001 | 0.043    | 0.835 | 0.835 | PC2                   | -0.316  | 0.008  | 0.492    | 0.483 | 0.483        |
| TLR4*aa01  | 0.025                      | 0.000 | 0.002    | 0.963 | 0.963 | TLR4*aa01             | 0.550   | 0.009  | 0.783    | 0.376 | 0.564        |
| TLR4*aa02  | -0.512                     | 0.012 | 0.741    | 0.389 | 0.963 | TLR4*aa02             | -0.886  | 0.019  | 1.612    | 0.204 | 0.380        |
| TLR4*aa03  | 1.248                      | 0.028 | 2.046    | 0.153 | 0.963 | TLR4*aa03             | -16.577 | 0.039  | 4.860    | 0.027 | 0.118        |
| TLR4*aa04  | -0.102                     | 0.001 | 0.038    | 0.845 | 0.963 | TLR4*aa04             | -0.462  | 0.007  | 0.636    | 0.425 | 0.592        |
| TLR 5      |                            |       |          |       |       |                       |         |        |          |       |              |

|           |        |       |       |       |       |           |        |       |       |       |              |
|-----------|--------|-------|-------|-------|-------|-----------|--------|-------|-------|-------|--------------|
| PC1       | -0.169 | 0.004 | 0.337 | 0.562 | 0.562 | PC1       | -0.930 | 0.085 | 6.453 | 0.011 | 0.011        |
| PC2       | 0.048  | 0.000 | 0.012 | 0.911 | 0.911 | PC2       | -0.705 | 0.028 | 1.926 | 0.165 | 0.165        |
| TLR5*aa01 | -0.037 | 0.000 | 0.004 | 0.951 | 0.963 | TLR5*aa01 | 1.602  | 0.046 | 4.217 | 0.040 | 0.140        |
| TLR5*aa02 | -0.189 | 0.001 | 0.082 | 0.774 | 0.963 | TLR5*aa02 | 2.247  | 0.094 | 7.470 | 0.006 | <b>0.066</b> |
| TLR5*aa03 | 0.461  | 0.007 | 0.631 | 0.427 | 0.963 | TLR5*aa03 | 1.388  | 0.060 | 3.661 | 0.056 | 0.146        |
| TLR5*aa04 | 0.556  | 0.010 | 0.855 | 0.355 | 0.963 | TLR5*aa04 | -0.698 | 0.004 | 0.792 | 0.373 | 0.564        |
| TLR5*aa06 | 0.141  | 0.001 | 0.059 | 0.808 | 0.963 | TLR5*aa06 | 1.111  | 0.040 | 2.585 | 0.108 | 0.240        |

TLR 6

|           |        |       |       |       |       |           |        |       |       |       |       |
|-----------|--------|-------|-------|-------|-------|-----------|--------|-------|-------|-------|-------|
| PC1       | -0.220 | 0.006 | 0.543 | 0.461 | 0.461 | PC1       | -0.406 | 0.020 | 1.519 | 0.218 | 0.218 |
| PC2       | -0.249 | 0.004 | 0.360 | 0.549 | 0.549 | PC2       | -0.144 | 0.001 | 0.102 | 0.750 | 0.750 |
| TLR6*aa01 | 0.031  | 0.000 | 0.003 | 0.955 | 0.963 | TLR6*aa01 | -0.200 | 0.003 | 0.109 | 0.741 | 0.864 |
| TLR6*aa02 | 0.101  | 0.000 | 0.026 | 0.871 | 0.963 | TLR6*aa02 | -0.102 | 0.000 | 0.020 | 0.887 | 0.931 |
| TLR6*aa04 | 0.781  | 0.025 | 2.127 | 0.145 | 0.963 | TLR6*aa04 | -0.374 | 0.006 | 0.414 | 0.520 | 0.642 |
| TLR6*aa05 | 0.709  | 0.013 | 1.173 | 0.279 | 0.963 | TLR6*aa05 | -0.110 | 0.000 | 0.027 | 0.870 | 0.931 |



| b)<br>predictors | Cryptosporidium sp. |       |          |       |       | Babesia sp. |        |       |          |       | Hepatozoon sp. |            |        |       |          |       |       |
|------------------|---------------------|-------|----------|-------|-------|-------------|--------|-------|----------|-------|----------------|------------|--------|-------|----------|-------|-------|
|                  | B                   | R2    | $\chi^2$ | p     | FDR   | predictors  | B      | R2    | $\chi^2$ | p     | FDR            | predictors | B      | R2    | $\chi^2$ | p     | FDR   |
| TLR 1            |                     |       |          |       |       |             |        |       |          |       |                |            |        |       |          |       |       |
| mass             | -0.125              | 0.039 | 3.687    | 0.055 | 0.055 | PC1         | -0.254 | 0.004 | 0.269    | 0.604 | 0.604          | PC1        | -0.426 | 0.014 | 1.054    | 0.305 | 0.305 |
| PC1              | -0.512              | 0.009 | 0.595    | 0.441 | 0.441 | PC2         | -0.531 | 0.011 | 1.025    | 0.311 | 0.311          | PC2        | 0.106  | 0.000 | 0.043    | 0.836 | 0.836 |
| PC2              | 0.184               | 0.002 | 0.134    | 0.715 | 0.715 | TLR1*aa01   | -0.014 | 0.000 | 0.000    | 0.986 | 0.991          | TLR1*aa01  | 0.235  | 0.002 | 0.148    | 0.701 | 0.854 |
| site             | -1.653              | 0.017 | 1.882    | 0.170 | 0.170 | TLR1*aa02   | 1.284  | 0.061 | 4.529    | 0.033 | 0.269          | TLR1*aa02  | -0.263 | 0.002 | 0.221    | 0.639 | 0.854 |
| TLR1*aa01        | -0.162              | 0.000 | 0.059    | 0.808 | 0.989 | TLR1*aa04   | -0.249 | 0.000 | 0.077    | 0.782 | 0.912          | TLR1*aa04  | -0.707 | 0.012 | 0.871    | 0.351 | 0.705 |
| TLR1*aa02        | -1.354              | 0.052 | 5.810    | 0.016 | 0.227 | TLR1*aa06   | 0.733  | 0.012 | 0.850    | 0.357 | 0.673          | TLR1*aa06  | -0.057 | 0.000 | 0.007    | 0.936 | 0.971 |
| TLR1*aa04        | -0.850              | 0.008 | 0.794    | 0.373 | 0.767 | TLR1*aa10   | 0.010  | 0.000 | 0.000    | 0.991 | 0.991          | TLR1*aa10  | -0.252 | 0.002 | 0.117    | 0.732 | 0.854 |
| TLR1*aa06        | 0.723               | 0.011 | 0.966    | 0.326 | 0.767 |             |        |       |          |       |                |            |        |       |          |       |       |
| TLR1*aa10        | 0.028               | 0.000 | 0.001    | 0.971 | 0.989 |             |        |       |          |       |                |            |        |       |          |       |       |
| TLR 2            |                     |       |          |       |       |             |        |       |          |       |                |            |        |       |          |       |       |
| mass             | -0.113              | 0.030 | 3.293    | 0.070 | 0.070 | PC1         | -0.536 | 0.019 | 1.646    | 0.200 | 0.200          | PC1        | 0.159  | 0.002 | 0.234    | 0.628 | 0.628 |
| PC1              | -0.535              | 0.009 | 0.693    | 0.405 | 0.405 | PC2         | -0.470 | 0.014 | 0.826    | 0.363 | 0.363          | PC2        | 0.255  | 0.006 | 0.273    | 0.601 | 0.601 |
| PC2              | -0.066              | 0.000 | 0.020    | 0.888 | 0.888 | TLR2*aa01   | 0.850  | 0.022 | 1.445    | 0.229 | 0.673          | TLR2*aa01  | 0.073  | 0.001 | 0.013    | 0.908 | 0.971 |
| site             | -0.455              | 0.002 | 0.172    | 0.678 | 0.678 | TLR2*aa06   | 1.768  | 0.048 | 4.285    | 0.038 | 0.269          | TLR2*aa06  | -1.069 | 0.022 | 1.860    | 0.173 | 0.705 |
| TLR2*aa01        | 0.095               | 0.000 | 0.026    | 0.872 | 0.989 | TLR2*aa12   | 0.733  | 0.008 | 0.795    | 0.373 | 0.673          | TLR2*aa12  | 0.805  | 0.017 | 1.109    | 0.292 | 0.705 |
| TLR2*aa06        | -0.881              | 0.014 | 1.403    | 0.236 | 0.767 |             |        |       |          |       |                |            |        |       |          |       |       |
| TLR2*aa12        | -1.423              | 0.036 | 3.110    | 0.078 | 0.545 |             |        |       |          |       |                |            |        |       |          |       |       |
| TLR 4            |                     |       |          |       |       |             |        |       |          |       |                |            |        |       |          |       |       |
| mass             | -0.106              | 0.037 | 3.106    | 0.078 | 0.078 | PC1         | -0.117 | 0.002 | 0.112    | 0.737 | 0.737          | PC1        | -0.188 | 0.003 | 0.375    | 0.540 | 0.540 |
| PC1              | -0.422              | 0.006 | 0.456    | 0.499 | 0.499 | PC2         | -0.331 | 0.003 | 0.476    | 0.490 | 0.490          | PC2        | -0.024 | 0.000 | 0.002    | 0.964 | 0.964 |
| PC2              | 0.011               | 0.000 | 0.001    | 0.981 | 0.981 | TLR4*aa01   | 0.491  | 0.010 | 0.498    | 0.481 | 0.673          | TLR4*aa01  | -0.482 | 0.009 | 0.628    | 0.428 | 0.705 |
| site             | -1.116              | 0.016 | 1.157    | 0.282 | 0.282 | TLR4*aa02   | -0.606 | 0.012 | 0.681    | 0.409 | 0.673          | TLR4*aa02  | -0.290 | 0.000 | 0.147    | 0.702 | 0.854 |
| TLR4*aa01        | -0.049              | 0.000 | 0.007    | 0.931 | 0.989 | TLR4*aa03   | -0.589 | 0.000 | 0.285    | 0.594 | 0.764          | TLR4*aa03  | 0.748  | 0.006 | 0.688    | 0.407 | 0.705 |
| TLR4*aa02        | -0.067              | 0.000 | 0.009    | 0.925 | 0.989 | TLR4*aa04   | -0.962 | 0.025 | 1.972    | 0.160 | 0.673          | TLR4*aa04  | 1.391  | 0.080 | 5.760    | 0.016 | 0.344 |
| TLR4*aa03        | 0.730               | 0.007 | 0.703    | 0.402 | 0.767 |             |        |       |          |       |                |            |        |       |          |       |       |
| TLR4*aa04        | -0.622              | 0.012 | 1.082    | 0.298 | 0.767 |             |        |       |          |       |                |            |        |       |          |       |       |
| TLR 5            |                     |       |          |       |       |             |        |       |          |       |                |            |        |       |          |       |       |

|           |        |       |       |       |       |           |        |       |       |       |       |           |        |       |       |       |       |
|-----------|--------|-------|-------|-------|-------|-----------|--------|-------|-------|-------|-------|-----------|--------|-------|-------|-------|-------|
| mass      | -0.132 | 0.056 | 4.490 | 0.034 | 0.034 | PC1       | -0.332 | 0.019 | 0.780 | 0.377 | 0.377 | PC1       | -0.244 | 0.006 | 0.509 | 0.475 | 0.475 |
| PC1       | -0.100 | 0.000 | 0.026 | 0.872 | 0.872 | PC2       | -0.453 | 0.012 | 0.683 | 0.409 | 0.409 | PC2       | -0.163 | 0.002 | 0.099 | 0.753 | 0.753 |
| PC2       | -0.026 | 0.000 | 0.003 | 0.958 | 0.958 | TLR5*aa01 | -0.090 | 0.001 | 0.013 | 0.908 | 0.991 | TLR5*aa01 | 1.317  | 0.035 | 3.218 | 0.073 | 0.507 |
| site      | -2.096 | 0.046 | 3.181 | 0.075 | 0.075 | TLR5*aa02 | 1.237  | 0.044 | 2.224 | 0.136 | 0.673 | TLR5*aa02 | 1.571  | 0.038 | 3.775 | 0.052 | 0.507 |
| TLR5*aa01 | -0.578 | 0.010 | 0.734 | 0.392 | 0.767 | TLR5*aa03 | 0.605  | 0.011 | 0.665 | 0.415 | 0.673 | TLR5*aa03 | 0.413  | 0.006 | 0.324 | 0.569 | 0.854 |
| TLR5*aa02 | 0.813  | 0.019 | 1.200 | 0.273 | 0.767 | TLR5*aa04 | 0.787  | 0.021 | 1.145 | 0.285 | 0.673 | TLR5*aa04 | 0.557  | 0.006 | 0.605 | 0.437 | 0.705 |
| TLR5*aa03 | -0.061 | 0.000 | 0.009 | 0.926 | 0.989 | TLR5*aa06 | -0.630 | 0.005 | 0.602 | 0.438 | 0.673 | TLR5*aa06 | 0.822  | 0.016 | 1.452 | 0.228 | 0.705 |
| TLR5*aa04 | -0.437 | 0.003 | 0.366 | 0.545 | 0.901 |           |        |       |       |       |       |           |        |       |       |       |       |
| TLR5*aa06 | 0.314  | 0.001 | 0.239 | 0.625 | 0.937 |           |        |       |       |       |       |           |        |       |       |       |       |

---

TLR 6

|           |        |       |       |       |       |           |        |       |       |       |       |           |        |       |       |       |       |
|-----------|--------|-------|-------|-------|-------|-----------|--------|-------|-------|-------|-------|-----------|--------|-------|-------|-------|-------|
| mass      | -0.129 | 0.043 | 4.339 | 0.037 | 0.037 | PC1       | -0.347 | 0.019 | 0.755 | 0.385 | 0.385 | PC1       | -0.197 | 0.004 | 0.337 | 0.561 | 0.561 |
| PC1       | -0.198 | 0.003 | 0.090 | 0.764 | 0.764 | PC2       | -0.479 | 0.015 | 0.860 | 0.354 | 0.354 | PC2       | 0.353  | 0.006 | 0.484 | 0.487 | 0.487 |
| PC2       | 0.089  | 0.001 | 0.035 | 0.852 | 0.852 | TLR6*aa01 | 0.378  | 0.003 | 0.248 | 0.618 | 0.764 | TLR6*aa01 | -0.603 | 0.011 | 0.900 | 0.343 | 0.705 |
| site      | -1.503 | 0.019 | 1.878 | 0.171 | 0.171 | TLR6*aa02 | 1.635  | 0.060 | 4.409 | 0.036 | 0.269 | TLR6*aa02 | -0.026 | 0.000 | 0.001 | 0.971 | 0.971 |
| TLR6*aa01 | 0.378  | 0.002 | 0.343 | 0.558 | 0.901 | TLR6*aa04 | 0.532  | 0.012 | 0.524 | 0.469 | 0.673 | TLR6*aa04 | -1.039 | 0.033 | 2.760 | 0.097 | 0.507 |
|           |        |       |       |       |       | TLR6*aa05 | 0.716  | 0.014 | 0.808 | 0.369 | 0.673 | TLR6*aa05 | -0.622 | 0.010 | 0.791 | 0.374 | 0.705 |

---





Table S7. FDR-adjusted p-values from a GLM models testing for effects of non-synonymous SNPs on a presence of infection with parasites.

| SNP       | <i>H. mixtum</i> | <i>H.glareoli</i> | <i>A.tetraptera</i> | <i>Cryptosporidium</i> | <i>Haemobar-tonella</i> | <i>Bartonella</i> | <i>Babesia</i> | <i>Hepatozoon</i> |
|-----------|------------------|-------------------|---------------------|------------------------|-------------------------|-------------------|----------------|-------------------|
| TLR1 104  | 1.000            | 1.000             | 0.695               | 0.684                  | 0.390                   | 0.445             | 0.902          | 0.766             |
| TLR1 161  | 0.812            | 1.000             | 0.861               | 0.861                  | 0.390                   | 0.852             | 0.902          | 0.845             |
| TLR1 236  | 0.678            | 1.000             | 0.395               | 0.746                  | 0.849                   | 0.844             | 0.902          | 0.541             |
| TLR1 283  | 1.000            | 1.000             | 0.663               | 0.870                  | 0.908                   | 0.852             | 0.902          | 0.766             |
| TLR1 367  | 1.000            | 1.000             | 0.729               | 0.469                  | 0.618                   | 0.871             | 0.902          | 0.710             |
| TLR1 394  | 1.000            | 1.000             | 0.729               | 0.469                  | 0.618                   | 0.871             | 0.902          | 0.710             |
| TLR1 562  | 1.000            | 1.000             | 0.772               | 0.469                  | 0.505                   | 0.906             | 0.902          | 0.666             |
| TLR1 602  | 1.000            | 1.000             | 0.695               | 0.684                  | 0.390                   | 0.445             | 0.902          | 0.766             |
| TLR1 642  | 1.000            | 1.000             | 0.663               | 0.875                  | 0.854                   | 0.805             | 0.902          | 0.347             |
| TLR1 988  | 0.803            | 1.000             | 0.663               | 0.921                  | 0.829                   | 0.852             | 0.902          | 0.333             |
| TLR1 1109 | 1.000            | 1.000             | 0.738               | 0.861                  | 0.789                   | 0.445             | 0.902          | 0.766             |
| TLR2 1996 | 1.000            | 1.000             | 0.672               | 0.861                  | 0.789                   | 0.852             | 0.902          | 0.710             |
| TLR2 1687 | 0.678            | 1.000             | 0.921               | 0.841                  | 0.390                   | 0.770             | 0.902          | 0.580             |
| TLR2 1628 | 1.000            | 1.000             | 0.663               | 0.870                  | 0.671                   | 0.748             | 0.902          | 0.284             |
| TLR2 1600 | 0.678            | 1.000             | 0.497               | 0.861                  | 0.789                   | 0.445             | 0.902          | 0.580             |
| TLR2 1561 | 1.000            | 1.000             | 0.507               | 0.684                  | 0.796                   | 0.852             | 0.902          | 0.766             |
| TLR2 1502 | 1.000            | 1.000             | 0.876               | 0.875                  | 0.796                   | 0.844             | 0.996          | 0.347             |
| TLR2 1444 | 0.777            | 1.000             | 0.538               | 0.861                  | 0.705                   | 0.502             | 0.902          | 0.580             |
| TLR2 1352 | 0.812            | 1.000             | 0.674               | 0.861                  | 0.789                   | 0.748             | 0.902          | 0.541             |
| TLR2 1244 | 0.790            | 1.000             | 0.713               | 0.786                  | 0.796                   | 0.852             | 0.902          | 0.424             |
| TLR2 1028 | 1.000            | 1.000             | 0.391               | 0.870                  | 0.618                   | 0.445             | 0.939          | 0.923             |
| TLR2 981  | 1.000            | 1.000             | 0.391               | 0.870                  | 0.618                   | 0.445             | 0.939          | 0.923             |

|           |       |       |       |       |       |       |       |       |
|-----------|-------|-------|-------|-------|-------|-------|-------|-------|
| TLR2 833  | 1.000 | 1.000 | 0.663 | 0.861 | 0.789 | 0.995 | 0.902 | 0.182 |
| TLR2 820  | 0.812 | 1.000 | 0.695 | 0.861 | 0.789 | 0.748 | 0.902 | 0.541 |
| TLR2 739  | 1.000 | 1.000 | 0.391 | 0.870 | 0.618 | 0.445 | 0.939 | 0.923 |
| TLR2 587  | 1.000 | 1.000 | 0.663 | 0.870 | 0.646 | 0.744 | 0.902 | 0.284 |
| TLR2 554  | 0.329 | 1.000 | 0.225 | 0.861 | 0.854 | 0.844 | 0.902 | 0.766 |
| TLR2 476  | 0.329 | 1.000 | 0.980 | 0.684 | 0.796 | 0.445 | 0.902 | 0.541 |
| TLR2 404  | 0.329 | 1.000 | 0.150 | 0.861 | 0.390 | 0.906 | 0.902 | 0.182 |
| TLR2 379  | 1.000 | 1.000 | 0.663 | 0.767 | 0.849 | 0.445 | 0.902 | 0.923 |
| TLR2 365  | 0.329 | 1.000 | 0.150 | 0.861 | 0.390 | 0.906 | 0.902 | 0.182 |
| TLR2 327  | 0.977 | 1.000 | 0.672 | 0.841 | 0.901 | 0.445 | 0.902 | 0.766 |
| TLR2 305  | 0.329 | 1.000 | 0.150 | 0.861 | 0.390 | 0.906 | 0.902 | 0.182 |
| TLR2 295  | 0.790 | 1.000 | 0.861 | 0.861 | 0.789 | 0.762 | 0.902 | 0.541 |
| TLR2 293  | 0.329 | 1.000 | 0.150 | 0.861 | 0.390 | 0.906 | 0.902 | 0.182 |
| TLR2 232  | 1.000 | 1.000 | 0.568 | 0.861 | 0.771 | 0.860 | 0.996 | 0.206 |
| TLR2 97   | 1.000 | 1.000 | 0.663 | 0.861 | 0.979 | 0.744 | 0.902 | 0.284 |
| TLR2 26   | 1.000 | 1.000 | 0.663 | 0.853 | 0.789 | 0.990 | 0.971 | 0.587 |
| TLR4 1833 | 1.000 | 0.740 | 0.270 | 0.786 | 0.796 | 0.852 | 0.902 | 0.726 |
| TLR4 1544 | 0.329 | 1.000 | 0.961 | 0.930 | 0.996 | 0.852 | 0.902 | 0.290 |
| TLR4 1268 | 1.000 | 1.000 | 0.663 | 0.870 | 0.796 | 0.805 | 0.902 | 0.693 |
| TLR4 1267 | 1.000 | 1.000 | 0.663 | 0.870 | 0.796 | 0.805 | 0.902 | 0.693 |
| TLR4 1187 | 1.000 | NA    | 0.672 | 0.861 | 0.849 | 0.684 | 0.902 | 0.580 |
| TLR4 710  | 1.000 | 1.000 | 0.665 | 0.861 | 0.995 | 0.852 | 0.902 | 0.182 |
| TLR4 350  | 1.000 | 1.000 | 0.663 | 0.870 | 0.789 | 0.852 | 0.902 | 0.284 |
| TLR4 157  | 1.000 | 1.000 | 0.663 | 0.870 | 0.789 | 0.852 | 0.902 | 0.284 |

|           |       |       |       |       |       |       |       |       |
|-----------|-------|-------|-------|-------|-------|-------|-------|-------|
| TLR5 175  | 1.000 | 1.000 | 0.663 | 0.870 | 0.849 | 0.595 | 0.902 | 0.766 |
| TLR5 317  | 1.000 | 1.000 | 0.758 | 0.861 | 0.796 | 0.852 | 0.902 | 0.182 |
| TLR5 358  | 0.812 | 1.000 | 0.663 | 0.861 | 0.513 | 0.714 | 0.902 | 0.713 |
| TLR5 404  | 0.925 | 1.000 | 0.889 | 0.684 | 0.849 | 0.684 | 0.902 | 0.923 |
| TLR5 584  | 0.329 | 1.000 | 0.663 | 0.861 | 0.796 | 0.445 | 0.902 | 0.766 |
| TLR5 1057 | 0.329 | 1.000 | 0.663 | 0.861 | 0.796 | 0.445 | 0.902 | 0.766 |
| TLR5 1058 | 0.329 | 1.000 | 0.663 | 0.861 | 0.796 | 0.445 | 0.902 | 0.766 |
| TLR5 1059 | 0.329 | 1.000 | 0.663 | 0.861 | 0.796 | 0.445 | 0.902 | 0.766 |
| TLR5 1061 | 0.329 | 1.000 | 0.663 | 0.861 | 0.796 | 0.445 | 0.902 | 0.766 |
| TLR5 1072 | 1.000 | 1.000 | 0.270 | 0.870 | 0.789 | 0.445 | 0.902 | 0.927 |
| TLR5 1106 | 0.329 | 1.000 | 0.663 | 0.861 | 0.796 | 0.445 | 0.902 | 0.766 |
| TLR5 1349 | 0.329 | 1.000 | 0.663 | 0.861 | 0.796 | 0.445 | 0.902 | 0.766 |
| TLR5 1409 | 0.329 | 1.000 | 0.663 | 0.861 | 0.796 | 0.445 | 0.902 | 0.766 |
| TLR5 1663 | 0.329 | 1.000 | 0.663 | 0.861 | 0.796 | 0.445 | 0.902 | 0.766 |
| TLR5 1729 | 0.329 | 1.000 | 0.663 | 0.861 | 0.796 | 0.445 | 0.902 | 0.766 |
| TLR5 1795 | 0.329 | 1.000 | 0.663 | 0.861 | 0.796 | 0.445 | 0.902 | 0.766 |
| TLR5 1898 | 0.329 | 1.000 | 0.758 | 0.870 | 0.796 | 0.445 | 0.953 | 0.923 |
| TLR5 2203 | 1.000 | 1.000 | 0.719 | 0.684 | 0.878 | 0.445 | 0.902 | 0.541 |
| TLR5 2206 | 0.329 | 1.000 | 0.663 | 0.861 | 0.789 | 0.852 | 0.902 | 0.347 |
| TLR5 2231 | 1.000 | 1.000 | 0.719 | 0.684 | 0.878 | 0.445 | 0.902 | 0.541 |
| TLR6 98   | 1.000 | 0.777 | 0.270 | 0.921 | 0.854 | 0.445 | 0.902 | 0.580 |
| TLR6 106  | 1.000 | 1.000 | 0.391 | 0.930 | 0.789 | 0.770 | 0.902 | 0.541 |
| TLR6 181  | 0.977 | 1.000 | 0.270 | 0.786 | 0.390 | 0.852 | 0.902 | 0.923 |
| TLR6 238  | 0.775 | 1.000 | 0.663 | 0.684 | 0.849 | 0.852 | 0.902 | 0.667 |

|           |       |       |       |       |       |       |       |       |
|-----------|-------|-------|-------|-------|-------|-------|-------|-------|
| TLR6 680  | 0.329 | 1.000 | 0.731 | 0.684 | 0.849 | 0.445 | 0.902 | 0.766 |
| TLR6 868  | 0.775 | 1.000 | 0.663 | 0.555 | 0.854 | 0.852 | 0.902 | 0.766 |
| TLR6 898  | 1.000 | 1.000 | 0.270 | 0.684 | 0.390 | 0.852 | 0.902 | 0.923 |
| TLR6 1195 | 0.416 | 1.000 | 0.944 | 0.469 | 0.789 | 0.981 | 0.902 | 0.927 |
| TLR7 2270 | 1.000 | 1.000 | 0.663 | 0.684 | 0.942 | 0.445 | 0.902 | 0.284 |

---



## SUPPLEMENTARY FIGURES

Fig S1. Sliding window Tajima's D for TLR5 and TLR6. Stars indicate regions where D was significant at  $p < 0.1$ . Gray bars below the graph represent location of LRRs.

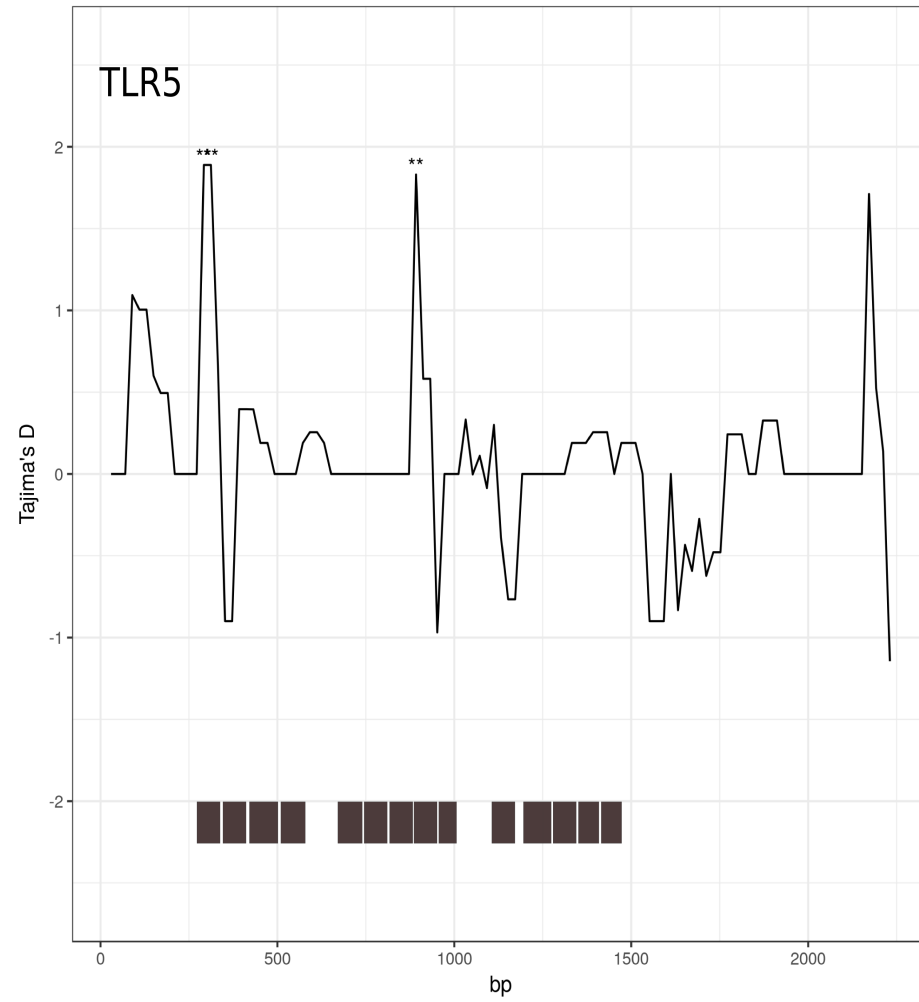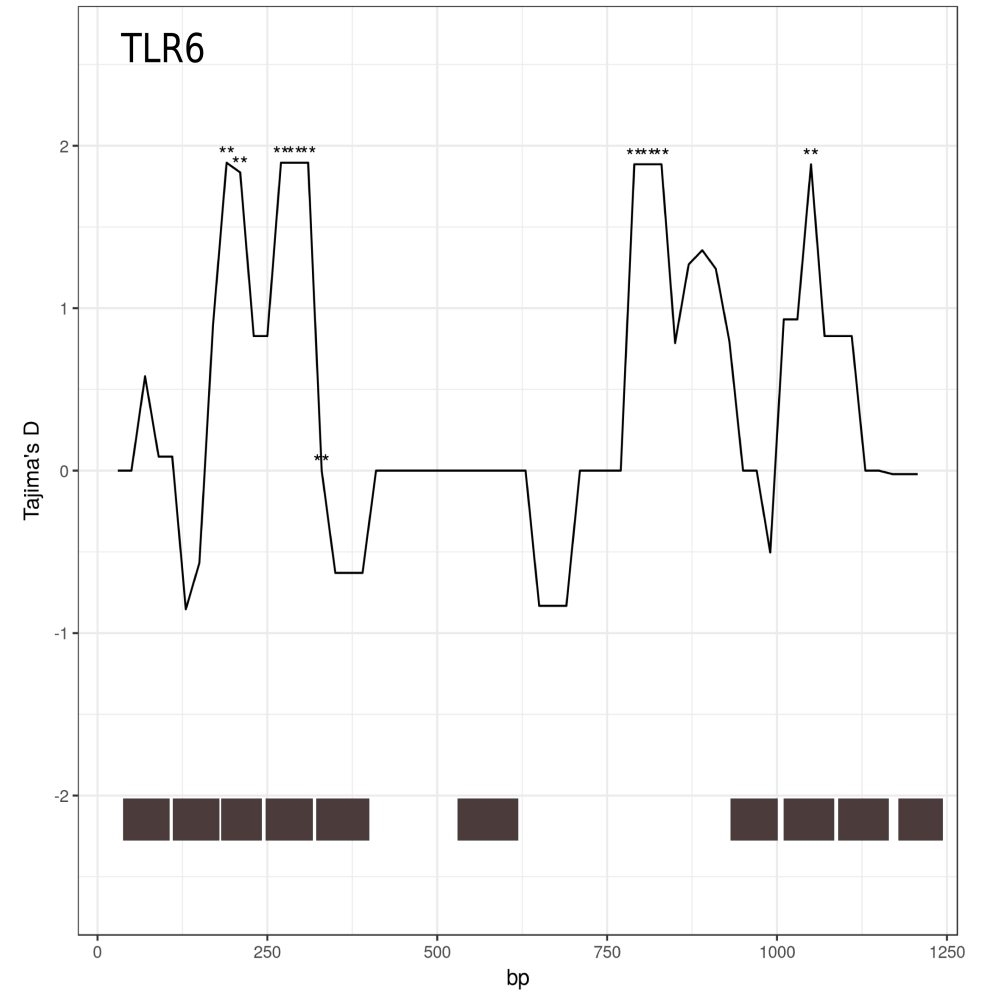

## SUPPLEMENTARY FILE (SCRIPT)

Two-part python script used do phase SNPs that could not be phased based on their physical location in the reads.

This is a prototype of wrapper scripts allowing usage of PHASE to retrieve haplotypes from partially phased vcf file.

The script uses Biopython to handle sequences and PyVCF for VCF format.

### Usage

In the beginning the input file for PHASE is prepared from provided unphased VCF. Then one should run PHASE manually using generated file. Eventually variant sequences are produced by superimposing phased sets of variants onto reference sequence. At current stage only FASTA format is supported. All parameters are hardcoded - please edit headers of source files in order to use script s with your data.

### part\_1.py

```
## this part should be passed by options
chrom = 'TNFb_full'
reference_file = "data/TNFb_ref.fna"
vcffile = 'data/TNF.second.vcf'
phase_pfx = 'data/' + chrom
phase_in_fn = phase_pfx + '.inp'
phase_known_fn = phase_pfx + '.known'

locilist = dict()
genotypes = dict()
ids = set()

import vcf
vcf_reader=vcf.Reader(open(vcffile, 'r'))
for record in vcf_reader:
    if record.CHROM != chrom:
        continue
    locilist[record.POS] = 'S' if record.is_snp else 'M'
    for sample in record.samples:
        ids.add(sample.sample)
        x = sample.data.GT
        if not sample.sample in genotypes.keys():
            genotypes[sample.sample] = dict()
        if x != '.':
            genotypes[sample.sample][record.POS] = [int(a) + 1 for a in
x.split('/')]
        else:
            genotypes[sample.sample][record.POS] = ['?', '?'] if record.is_snp
else ['-1', '-1']

if not len(locilist):
    exit()

phase_in = open(phase_in_fn, 'w')
#phase_known = open(phase_known_fn, 'w')
print(len(ids), file=phase_in)
print(len(locilist), file=phase_in)
print("P %s" % " ".join([str(x) for x in sorted(locilist.keys())] ),
```

```

file=phase_in)
print(" ".join(locilist[y] for y in sorted(locilist.keys()) ), file=phase_in)
for id in ids:
    print(id, file=phase_in)
    for j in [0, 1]:
        print(" ".join(str(genotypes[id][i][j]) for i in
sorted(locilist.keys()))), file=phase_in)
phase_in.close()

```

## part\_2.py

```

## this part should be passed by options
chrom = 'TNFb_full'
reference_file = "data/TNFb_ref.fas"
vcffile = 'data/TNF.second.vcf'
phase_pfx = 'data/TNFb_res'
phase_in_fn = phase_pfx + '.out'
frame_positions_fn = 'data/start_stop.txt'
pos_start = 0
pos_stop = 0

refseq=''
from Bio.Seq import Seq
from Bio import SeqIO
from Bio.Alphabet import IUPAC
for seq_record in SeqIO.parse(reference_file, "fasta", IUPAC.ambiguous_dna):
    if seq_record.id != chrom:
        continue
    refseq = seq_record

varlist = dict()
import vcf
vcf_reader=vcf.Reader(open(vcffile, 'r'))
for record in vcf_reader:
    if record.CHROM != chrom:
        continue
    varlist[record.POS] = {'alleles': record.alleles,\
                           'start': record.affected_start,\
                           'end': record.affected_end}

def read_section(filename, section):
    """Read section of file where divisions are made with lines
BEGIN Section_Name; END Section_Name. Specifically for PHASE
output file"""
    with open(filename) as file:
        recording = False
        for line in file:
            if "BEGIN " + section in line:
                recording = True
            elif "END " + section in line:
                recording = False
            elif recording:
                yield line

poslist = []
for line in open(phase_in_fn, "r"):
    if line.startswith('Positions of loci'):
        tmp = line.partition(':')

```

```

        poslist = [int(x) for x in tmp[2].split()]

# TODO: this part should be made into try-except clause
if pos_start == 0 and pos_stop == 0:
    pos_stop = None

alleles = dict()
for line in read_section(phase_in_fn, 'LIST_SUMMARY'):
    a = line.split()
    allele_seq = refseq
    # WARNING: this won't work with multidigit allele symbols in PHASE output!!!
    varmap = dict(zip(poslist, ''.join(str(x) for x in a[1:-1])))
    for pos in reversed(sorted(poslist)):
        substitute = Seq(str(varlist[pos]['alleles'][int(varmap[pos])-1]),
IUPAC.ambiguous_dna)
        startN = pos - 1 if varlist[pos]['start'] == pos else varlist[pos]
['start']
        endN = varlist[pos]['end']
        allele_seq = allele_seq[:startN] + substitute + allele_seq[endN:]
        # TODO check pos_start < pos_stop in case of RC
        alleles[a[0]] = allele_seq[pos_start:pos_stop]

from Bio.SeqRecord import SeqRecord
genotypes_writeout = []
for line in read_section(phase_in_fn, 'BESTPAIRS_SUMMARY'):
    aid, tmp, haps = line.partition(':')
    hap1, tmp, hap2 = haps.lstrip(' ').rstrip('\n').partition(',')
    genotypes_writeout.append(SeqRecord(alleles[hap1].seq, id=aid + '-1',
description=chrom))
    genotypes_writeout.append(SeqRecord(alleles[hap2].seq, id=aid + '-2',
description=chrom))

SeqIO.write(genotypes_writeout, chrom + ".fas", "fasta")

```
